# Supplementary material
Source: publisher figshare collection journal article supplement (https://gsapubs.figshare.com/ndownloader/files/23300843)
Supplement: Supplementary file 1 [file 23300843]

## Sheet: Table 1
Table 1. Location of analyzed samples
Sample	Unit	Rock type	Geochemical group	Northing	Easting
DB02-191	outer OIC	Basalt	Group 1	8.71289	-83.5277
DB02-242	outer OIC	Basalt	Group 1	8.64599	-83.5586
DB02-250	outer OIC	Basalt	Group 1	8.60529	-83.5241
DB05-113	outer OIC	Basalt	Group 1	8.60213	-83.515
DB05-119	outer OIC	Basalt	Group 1	8.60665	-83.5268
DB05-121	outer OIC	Basalt	Group 1	8.6071	-83.5268
DB05-153	outer OIC	Basalt	Group 1	8.66724	-83.5649
DB05-161	outer OIC	Basalt	Group 1	8.64374	-83.554
DB02-198b	outer OIC	Basalt	Group 2	8.72196	-83.6158
DB02-260	outer OIC	Basalt	Group 2	8.70839	-83.6085
DB02-261	outer OIC	Basaltic dyke	Group 2	8.70839	-83.6085
DB05-149	outer OIC	Dolerite	Group 2	8.66588	-83.5677
DB05-155	outer OIC	Basalt	Group 2	8.67313	-83.5736
DB05-156	outer OIC	Basalt	Group 2	8.67312	-83.5733
DB02-196	outer OIC	Basalt	Group 3	8.62699	-83.5168
DB02-197	outer OIC	Basalt	Group 3	8.62789	-83.5177
DB02-198a	outer OIC	Basalt	Group 3	8.62789	-83.5177
DB02-207	outer OIC	Basalt	Group 3	8.70205	-83.5495
DB02-216	outer OIC	Basalt	Group 3	8.73552	-83.6067
DB02-239	outer OIC	Basalt	Group 3	8.63694	-83.5304
DB05-114	outer OIC	Basalt	Group 3	8.60596	-83.5009
DB05-135	outer OIC	Basalt	Group 3	8.62383	-83.5281
DB05-152	outer OIC	Gabbro	Group 3	8.66182	-83.5726
DB05-158	outer OIC	Gabbro	Group 3	8.69347	-83.5822
DJ01-104	outer OIC	Basalt	Group 3	8.731	-83.6512
DJ01-106	outer OIC	Basalt	Group 3	8.73371	-83.6503
DJ01-107	outer OIC	Basalt	Group 3	8.73643	-83.6449
DB02-107	inner OIC	Basalt	n/a	8.73269	-83.3732
DB02-110	inner OIC	Basalt	n/a	8.73268	-83.3559
DB02-119	inner OIC	Basalt	n/a	8.66753	-83.3041
DB02-120	inner OIC	Basalt	n/a	8.65667	-83.2942
DB02-132	inner OIC	Basalt	n/a	8.6503	-83.2542
DB02-135	inner OIC	Basalt	n/a	8.63943	-83.236
DB02-160	inner OIC	Basalt	n/a	8.71828	-83.4404
DB02-165	inner OIC	Basalt	n/a	8.73181	-83.4095
DB02-201	inner OIC	Basalt	n/a	8.79607	-83.4867
DB02-203	inner OIC	Basalt	n/a	8.79425	-83.4849
DB02-204	inner OIC	Basalt	n/a	8.79425	-83.4849
DB02-230	inner OIC	Basalt	n/a	8.7228	-83.4586
DB02-246	inner OIC	Basalt	n/a	8.75902	-83.5549
DB02-266	inner OIC	Basalt	n/a	8.82413	-83.6276
DB05-107	inner OIC	Basalt	n/a	8.53108	-83.4033
DB05-108	inner OIC	Basalt	n/a	8.53832	-83.4101
DB06-054	inner OIC	Basalt	n/a	8.38612	-83.1306
DB06-058	inner OIC	Basalt	n/a	8.36709	-83.1015
DB06-061	inner OIC	Basalt	n/a	8.36816	-83.1459
DB06-065	inner OIC	Basalt	n/a	8.33269	-83.1119
DB06-066	inner OIC	Basalt	n/a	8.33191	-83.1106
DB06-070	inner OIC	Basalt	n/a	8.26539	-83.0041
DB06-075	inner OIC	Dolerite	n/a	8.33737	-83.1184
DJ01-022	inner OIC	Basalt	n/a	8.76537	-83.6476
DJ01-115	inner OIC	Basalt	n/a	8.79429	-83.6494
GDM-90303	inner OIC	Basalt	n/a	8.40063	-83.1326
GDM-91044	inner OIC	Basalt	n/a	8.39248	-83.1327

## Sheet: Table 2
Table 2. XRF analytical results (wt%)
Sample	Group	SiO2	TiO2	Al2O3	Fe2O3	MnO	MgO	CaO	Na2O	K2O	P2O5	LOI	Total
DB02-191	Group 1	47.5146	1.96006	13.4984	12.2721	0.183454	7.05816	9.64583	3.31183	0.19311	0.164143	3.42	99.2217
DB02-242	Group 1	42.2041	1.37057	14.046	12.5431	0.151235	12.354	9.29152	1.55961	0.179592	0.141783	5.45	99.2915
DB02-250	Group 1	44.228	2.01732	16.4636	12.9931	0.172093	7.84938	7.31397	2.89691	0.736178	0.200776	4.36	99.2313
DB05-113	Group 1	44.9051	2.03539	17.1888	10.6249	0.136342	8.07337	8.45318	2.45415	1.7627	0.233728	3.15226	99.0199
DB05-119	Group 1	43.1856	2.18333	15.7738	13.9944	0.221218	8.39667	6.88661	3.31827	0.625182	0.230836	4.30396	99.1199
DB05-121	Group 1	43.9874	1.93734	16.4093	13.2708	0.164674	7.4394	8.03998	3.061	0.755564	0.184048	3.61031	98.8598
DB05-153	Group 1	49.3365	1.9672	14.7002	9.62067	0.156593	7.02711	9.65004	3.66036	0.401269	0.254463	2.6556	99.43
DB05-161	Group 1	44.3263	1.73451	15.0998	10.7732	0.144542	6.90912	12.4114	3.24738	0.452899	0.173451	4.14741	99.42
DB02-198b	Group 2	43.0874	1.19081	17.7629	11.015	0.138928	6.95631	12.0768	2.203	0.317549	0.188545	3.81306	98.7503
DB02-260	Group 2	49.5603	1.49408	15.4716	11.0483	0.176931	6.31053	9.95727	3.08646	0.127783	0.147442	1.69	99.0707
DB02-261	Group 2	48.5028	2.36455	13.34	14.5026	0.25616	6.41384	9.33997	2.97539	0.0985229	0.226603	1.47	99.4904
DB05-149	Group 2	47.9834	1.05426	13.9122	11.9614	0.177351	9.08433	11.2815	1.78337	0.13794	0.0788228	2.07545	99.53
DB05-155	Group 2	48.8305	1.84022	13.5381	13.1999	0.228784	6.89337	10.3848	2.97419	0.119366	0.169101	1.05184	99.2301
DB05-156	Group 2	48.6374	2.3951	13.1681	15.1955	0.258392	6.03247	8.79528	3.43861	0.168949	0.21864	1.13159	99.4399
DB02-196	Group 3	47.7635	1.0019	14.1422	11.0209	0.183039	7.32155	10.6451	3.47774	0.0289009	0.0770689	3.64	99.3018
DB02-197	Group 3	47.6457	1.06838	15.7904	11.6051	0.196033	6.71412	11.1052	2.81307	0.284247	0.0784131	1.97	99.2708
DB02-198a	Group 3	48.1542	1.02456	15.2805	11.436	0.195154	7.74761	9.55278	3.10295	0.439096	0.0683038	2.41	99.4112
DB02-207	Group 3	44.643	0.701248	12.8594	12.016	0.161098	13.5701	8.18754	1.70574	0.265337	0.0663343	5.22	99.3957
DB02-216	Group 3	47.0256	0.821238	16.8647	9.82552	0.175979	6.90231	13.658	1.75002	0.0293299	0.0586598	2.22	99.3313
DB02-239	Group 3	47.5708	1.49783	13.1109	14.0349	0.213976	6.36093	9.97907	3.66677	0.0291786	0.136167	2.72	99.3205
DB05-114	Group 3	49.448	1.34967	13.0868	15.0064	0.219947	6.39845	10.6774	2.57937	0.0499879	0.0899782	0.554	99.46
DB05-135	Group 3	47.7714	1.61618	14.1986	13.9705	0.228049	6.28623	10.5696	3.15303	0.208219	0.138813	1.35938	99.4999
DB05-152	Group 3	47.5917	0.80714	20.4443	7.68751	0.127961	5.45311	10.7881	2.25409	1.90957	0.059059	2.08753	99.2101
DB05-158	Group 3	49.7904	0.986836	14.8225	8.98121	0.149521	7.57571	13.0382	2.58172	0.119616	0.0697763	1.01462	99.1301
DJ01-104	Group 3	49.7321	1.13424	14.3089	11.1973	0.252053	6.185	9.66528	3.4318	0.91127	0.0969436	3.05593	99.9708
DJ01-106	Group 3	49.8846	0.999634	13.9658	10.6177	0.184398	6.03662	11.0445	3.70738	0.456143	0.0776414	2.94678	99.9212
DJ01-107	Group 3	50.3985	1.01131	13.9227	11.0461	0.186552	6.50968	11.0753	3.56412	0.382922	0.0785482	1.81473	99.9904
DB02-107	inner OIC	47.6275	1.0791	14.6071	11.1932	0.343349	8.36791	12.8511	1.80504	0.0588599	0.0882898	1.9	99.9213
DB02-110	inner OIC	46.9245	1.25184	14.0637	12.5575	0.22494	7.8827	11.7067	2.06358	0.0978002	0.0978002	2.18	99.0511
DB02-119	inner OIC	48.0789	1.71085	14.1826	10.2165	0.174974	7.1642	11.2566	3.19813	0.291623	0.136091	2.77	99.1806
DB02-120	inner OIC	48.6179	1.12309	14.2948	12.62	0.197033	7.66459	11.7038	1.89152	0.05911	0.0886649	1.48	99.7404
DB02-132	inner OIC	48.936	1.34261	14.2454	11.4911	0.167826	7.80883	12.4191	2.16199	0.0691047	0.108593	1.28	100.031
DB02-135	inner OIC	48.1635	1.22566	14.551	11.3741	0.215716	7.55007	12.3252	2.0395	0.0882475	0.0980528	1.94	99.5712
DB02-160	inner OIC	46.1866	1.09968	13.9163	13.1864	0.17517	7.99945	11.3082	2.35507	0.136244	0.0778535	2.66	99.1011
DB02-165	inner OIC	48.7039	0.86445	14.4108	10.6878	0.186643	8.91956	12.4461	1.95484	0.0785864	0.0687631	1.77	100.091
DB02-201	inner OIC	46.445	0.62973	19.2504	8.93248	0.164699	6.12291	13.0887	2.10233	0.0871934	0.0484408	3.12	99.9919
DB02-203	inner OIC	48.799	1.64185	13.0668	15.8939	0.252593	5.98451	6.91716	4.3718	0.126296	0.126296	2.85	100.03
DB02-204	inner OIC	47.1091	1.13008	14.4421	12.4501	0.201116	6.63684	10.1707	2.71986	0.335194	0.0861927	4.21	99.4913
DB02-230	inner OIC	48.1159	1.28125	13.8375	12.5563	0.354808	7.24399	12.0043	2.08942	0.088702	0.108414	1.43	99.1106
DB02-246	inner OIC	51.137	1.16131	13.4633	14.5459	0.226357	5.16684	8.78855	2.80486	0.127941	0.127941	1.57	99.12
DB02-266	inner OIC	48.0945	1.3202	13.4367	13.691	0.215144	7.15843	9.99442	2.72842	0.283599	0.0880135	2.19	99.2004
DB05-107	inner OIC	48.5002	0.894471	14.4706	10.6343	0.198771	8.67637	12.8208	1.779	0.0894471	0.06957	1.18655	99.32
DB05-108	inner OIC	47.6826	0.914704	14.6058	11.1043	0.17704	9.12737	10.5535	2.49822	0.226217	0.0688487	2.20135	99.16
DB06-054	inner OIC	48.4673	0.904537	14.7807	10.7451	0.159039	9.00561	12.922	1.77925	0.0795197	0.0695798	0.677388	99.59
DB06-058	inner OIC	47.5331	1.29395	14.2433	12.7533	0.225461	7.61667	12.0965	2.22521	0.058816	0.107829	2.01589	100.17
DB06-061	inner OIC	51.7585	2.27694	11.572	18.0775	0.256279	2.6515	6.86039	3.94275	0.0689982	0.236565	1.41854	99.12
DB06-065	inner OIC	46.5662	0.960531	15.0941	11.7224	0.225431	8.18412	12.3497	2.2151	0.14702	0.0686094	2.03688	99.57
DB06-066	inner OIC	47.3279	2.96417	13.6648	14.2379	0.207492	6.29392	10.5821	2.76656	0.563192	0.286536	1.23541	100.13
DB06-070	inner OIC	47.7959	1.04875	14.2747	11.4295	0.174792	8.2832	11.1284	3.02002	0.0679746	0.0776853	2.94915	100.25
DB06-075	inner OIC	48.5698	1.47539	13.0818	15.7768	0.236062	6.16712	9.2556	3.67864	0.285242	0.118031	1.66551	100.31
DJ01-022	inner OIC	47.0371	0.883098	14.7312	10.6558	0.164974	8.32635	12.4119	2.54255	0.116452	0.0679306	2.95448	99.8918
DJ01-115	inner OIC	47.6704	1.25295	13.8893	11.918	0.213681	7.84793	11.0629	2.76814	0.194256	0.106841	2.86723	99.7915
GDM-90303	inner OIC	49.1301	0.960784	14.1315	11.1791	0.180147	8.12663	11.1591	2.29187	0.810661	0.0800653	1.88	99.93
GDM-91044	inner OIC	49.16	0.8607	14.6019	10.5386	0.180147	8.61701	12.29	1.85151	0.180147	0.0600488	1.47	99.81

## Sheet: Table 3
Table 3. LA-ICP-MS analytical results (ppm)
Sample	Group	Sc	V	Ni	Rb	Sr	Y	Zr	Nb	Cs	Ba	La	Ce	Pr	Nd	Sm	Eu	Gd	Tb	Dy	Ho	Er	Tm	Yb	Lu	Hf	Pb	Th	U
DB02-191	Group 1	43.6357	368.345	85.128	2.665	250.609	26.1537	103.432	8.06667	0.188	95.1723	6.91433	17.5413	2.497	12.6723	3.657	1.38333	4.79633	0.742667	5.07267	0.994333	2.57667	0.378	2.323	0.366333	2.88333	1.14467	0.58	0.189333
DB02-242	Group 1	40.1763	275.738	bdl	3.72	153.923	22.649	85.2578	14.214	0.3145	48.4817	10.7172	24.136	3.143	13.3182	3.46225	1.144	3.948	0.6465	4.28	0.9325	2.6195	0.33025	2.0935	0.307	2.39825	1.45025	0.98025	0.268
DB02-250	Group 1	35.1357	267.689	89.046	13.516	362.252	30.9277	129.375	7.92867	1.95667	107.547	6.98433	18.6563	2.90733	15.988	4.148	1.61867	5.48367	0.846333	5.81667	1.26233	3.38933	0.507	2.87733	0.438333	3.52633	1.047	0.587667	0.188667
DB05-113	Group 1	32.0027	278.337	147.039	18.8603	606.077	23.754	141.61	12.9107	bdl	362.12	11.375	27.1687	3.764	18.7223	5.34167	1.80067	5.26267	0.748667	4.87333	0.910667	2.27667	0.301	2.08367	0.276667	3.60933	0.836	0.897667	0.271
DB05-119	Group 1	37.8123	289.946	137.443	15.0657	622.613	35.4593	161.082	9.42333	bdl	157.66	8.559	22.5303	3.37733	17.6033	5.87733	1.77567	5.76567	0.978333	6.62767	1.28	3.785	0.566333	3.63233	0.506	4.12967	0.708333	0.751333	0.211333
DB05-121	Group 1	37.2413	276.924	92.434	16.4533	437.263	31.3593	122.825	7.537	bdl	116.67	7.38867	18.61	2.77633	13.4457	3.66167	1.57433	5.20533	0.773	6.347	1.183	3.07233	0.501667	2.89033	0.491333	3.108	0.885667	0.529	0.271333
DB05-153	Group 1	45.2423	364.53	69.907	4.451	239.709	37.9543	158.164	13.8067	bdl	59.9407	11.4463	27.941	3.76767	17.4213	4.938	1.58733	5.599	0.958333	6.67167	1.363	3.91967	0.515	3.57533	0.548333	3.56633	0.433667	0.946333	0.311667
DB05-161	Group 1	46.722	338.502	122.182	12.5913	203.14	27.628	101.862	13.2507	bdl	65.364	9.72767	24.386	3.46233	13.3347	3.887	1.697	4.753	0.749667	5.12633	1.03167	2.83367	0.421	2.69567	0.395333	2.92733	0.423	0.89	0.842333
DB02-198b	Group 2	38.964	249.452	bdl	5.724	243.9	23.831	68.5298	5.662	0.13125	143.975	4.14375	9.5485	1.41775	7.72675	2.65375	1.0635	3.50575	0.68875	4.281	0.91375	2.6865	0.3615	2.5945	0.4265	1.74575	3.1445	0.31375	0
DB02-260	Group 2	40.9813	322.947	bdl	1.337	170.551	39.3368	127.016	5.236	bdl	24.5957	5.9215	16.249	2.3945	12.8187	4.14	1.42475	5.526	0.92275	6.7135	1.4205	4.26725	0.6845	4.183	0.65275	3.31875	0.637	0.41925	0.13275
DB02-261	Group 2	48.6927	459.698	49.2203	1.44233	143.694	49.9653	145.85	5.11333	0.0313333	20.523	6.146	17.779	2.962	16.5333	5.08567	1.73167	7.14333	1.249	8.88333	1.87767	5.386	0.787	5.311	0.785333	4.05867	28.8387	0.353	0.131667
DB05-149	Group 2	58.9663	391.876	153.14	1.80233	94.5173	20.8523	47.573	3.31333	bdl	61.5613	2.67867	7.025	1.11033	6.08667	1.8	0.877667	2.87567	0.508667	3.46667	0.752667	2.17067	0.316667	2.35033	0.364333	1.44	0.283667	0.212	0.0793333
DB05-155	Group 2	49.2043	411.552	64.6013	1.19167	149.852	42.117	112.704	4.06333	bdl	31.8017	5.042	14.3967	2.26467	12.773	4.13967	1.51533	6.10367	0.997	7.25133	1.46967	4.687	0.636333	4.24533	0.635	3.258	0.709667	0.319333	0.0903333
DB05-156	Group 2	52.3343	515.299	47.6357	1.67533	176.629	52.0463	155.945	5.748	bdl	33.977	6.57633	19.3803	2.96133	17.547	5.453	1.76833	7.956	1.224	9.22167	1.94433	5.48633	0.833667	5.40733	0.819667	4.17767	0.642667	0.459333	0.162
DB02-196	Group 3	46.7563	349.812	77.8307	0.655333	28.672	26.341	45.3273	0.547667	0.0496667	4.60233	1.06933	3.93233	0.899	4.92133	2.20267	0.902	3.403	0.550667	4.35933	1.01667	2.84767	0.462333	2.87733	0.434667	1.59833	1.65567	0.0486667	0.0793333
DB02-197	Group 3	49.7115	329.945	68.4865	4.634	128.283	27.999	49.6555	0.64875	0.59025	50.6475	1.13475	4.52075	0.81475	5.50975	2.02	0.85525	3.74375	0.664	4.77	1.07875	2.87975	0.4825	3.141	0.38925	1.5145	1.47025	0.046	0
DB02-198a	Group 3	48.9103	320.132	67.41	6.45233	143.204	25.7243	44.5703	0.534667	0.383	47.591	1.04467	3.79367	0.728	4.81867	2.11867	0.843	3.116	0.588	4.55467	1.01633	2.852	0.453667	3.05967	0.479667	1.32933	1.23233	0.0416667	0.0483333
DB02-207	Group 3	44.4252	228.036	bdl	6.863	68.7003	19.43	33.7295	0.7475	0.2065	10.4805	0.821	2.513	0.53125	2.883	1.4605	0.58625	2.31925	0.463	3.29	0.73975	2.179	0.32175	2.253	0.28275	0.87275	0.844	0.061	0.0485
DB02-216	Group 3	49.1157	282.418	96.495	0.904667	82.7417	21.858	40.0303	0.421333	bdl	1.436	0.759667	3.30933	0.648	4.09633	1.75867	0.794	2.72933	0.499667	3.71033	0.820667	2.35767	0.329	2.45967	0.385	1.16367	0.885333	0.017	0.03
DB02-239	Group 3	51.559	391.934	bdl	0.5305	28.742	43.1112	97.2728	1.216	bdl	6.18525	2.393	8.3615	1.5875	9.4715	3.79125	1.286	5.47125	0.9825	7.474	1.6305	4.91625	0.7585	4.8825	0.719	2.64225	0.8075	0.1355	0.0875
DB05-114	Group 3	54.246	473.541	54.288	0.538667	66.4307	40.9027	64.5907	0.852667	bdl	13.3813	1.476	5.24233	1.121	6.74867	2.956	1.11067	4.564	0.823	6.54933	1.36267	4.64967	0.635667	4.28467	0.651667	1.855	0.243667	0.068	0.0306667
DB05-135	Group 3	55.672	435.027	49.864	2.88767	130.386	44.956	102.7	1.23833	bdl	25.638	2.41233	8.30367	1.70167	9.98133	4.045	1.59633	5.86367	1.04933	7.37267	1.73767	5.019	0.756333	5.082	0.778	2.846	0.247667	0.101333	0.062
DB05-152	Group 3	39.0863	253.923	65.9467	29.2733	194.465	20.3613	44.1003	0.621667	bdl	1180.76	1.163	3.62733	0.676333	4.23233	1.71233	0.714667	2.729	0.451333	3.366	0.69	1.95933	0.309333	2.11433	0.278333	1.26133	0.505333	0.078	0.0393333
DB05-158	Group 3	53.8567	333.362	127.304	0.799333	112.255	22.738	43.0653	1.48333	bdl	12.4053	1.93467	5.48067	1.00833	4.95267	1.97467	0.944333	3.07133	0.497667	3.87633	0.780667	2.43167	0.331	2.35633	0.314	1.153	0.260667	0.0995	0.0336667
DJ01-104	Group 3	43.3103	312.983	46.7193	20.364	107.667	27.7717	51.6897	0.745333	0.219667	58.2947	1.41433	4.68133	0.905333	5.60033	2.39133	0.917	3.60267	0.621667	4.74467	1.03	3.241	0.435333	3.12667	0.448333	1.657	1.71867	0.0833333	0.123667
DJ01-106	Group 3	44.042	304.23	66.181	7.52533	106.867	23.6367	38.016	0.500667	0.15	10.8387	1.02267	3.53333	0.681333	4.17767	1.86067	0.750333	2.86633	0.562333	3.93267	0.840333	2.643	0.452667	2.71733	0.423333	1.18467	1.07733	0.0416667	0.033
DJ01-107	Group 3	45.8307	320.101	52.695	7.88233	110.899	24.8073	41.5887	0.653	0.142333	30.0047	1.09067	3.754	0.689	4.85367	1.88233	0.793667	3.22867	0.560333	4.20733	1.04367	2.71333	0.366	2.69133	0.411667	1.252	1.44467	0.0643333	0.0813333
DB02-107	inner OIC	50.8283	313.581	113.733	0.855333	102.584	19.513	49.397	3.00467	0.0416667	27.848	2.70567	7.145	1.10167	5.92133	2.076	0.792667	2.976	0.542	3.521	0.815667	2.26967	0.330667	2.06233	0.342667	1.33933	0.697667	0.205	0.0756667
DB02-110	inner OIC	48.7963	331.315	100.964	1.08367	129.209	21.4953	57.5527	3.59867	0.0363333	17.4983	3.11933	8.49967	1.40633	7.561	2.45267	0.872333	3.07567	0.538	3.97533	0.840667	2.379	0.340333	2.353	0.321333	1.552	1.081	0.251667	0.088
DB02-119	inner OIC	46.496	339.748	85.1677	4.09333	231.136	21.038	85.1507	6.62267	0.0273333	54.0293	6.38	16.3433	2.33167	12.5643	3.999	1.20633	4.35267	0.588667	4.43267	0.85	2.073	0.303333	1.80467	0.275333	2.37433	0.596333	0.454	0.134667
DB02-120	inner OIC	52.473	354.897	93.68	0.677	111.528	21.3027	52.725	3.63733	0.0473333	19.692	3.02733	8.21133	1.37067	6.41433	2.50067	1.098	3.10633	0.499667	3.85767	0.847667	2.264	0.340667	2.63333	0.342	1.59333	0.991	0.234667	0.109
DB02-132	inner OIC	51.6563	356.506	92.9783	0.860333	116.36	23.2973	62.8023	3.822	0.0143333	34.393	3.333	9.34567	1.481	8.15667	2.649	1.02733	3.62267	0.591667	4.234	0.853333	2.48367	0.369	2.46967	0.372333	1.89133	0.740333	0.27	0.093
DB02-135	inner OIC	50.034	340.968	109.08	0.936	142.941	22.0537	57.5933	3.539	0.031	39.933	3.13167	8.53533	1.41767	7.15	2.65967	0.96	2.99467	0.568333	3.99833	0.929333	2.28467	0.323667	2.49233	0.380667	1.592	0.912	0.252667	0.091
DB02-160	inner OIC	54.3163	349.918	73.1713	2.038	101.195	23.61	46.9793	1.96267	0.0305	118.03	2.00867	5.56833	0.901	5.32667	1.95567	0.772667	2.921	0.53	4.18267	0.897333	2.79067	0.372333	2.66133	0.411333	1.334	0.821667	0.136667	0.0496667
DB02-165	inner OIC	49.3967	301.893	127.689	1.02233	96.7567	16.9103	36.4807	2.60167	0.0373333	14.6633	2.057	5.66833	0.888	4.78633	1.64033	0.611667	2.16267	0.376667	2.84533	0.626333	1.74667	0.264667	1.91833	0.253333	1.10767	1.10867	0.161667	0.0633333
DB02-201	inner OIC	39.675	232.931	68.0283	1.74933	195.189	15.3877	26.2047	1.05267	0.0256667	20.02	1.07733	2.99033	0.530333	3.371	1.313	0.479	1.67833	0.327	2.69733	0.605333	1.733	0.228667	1.5905	0.262333	0.770333	0.809667	0.0896667	0.0376667
DB02-203	inner OIC	52.7657	458.86	37.8767	1.94333	47.0117	30.8953	76.4083	4.68333	0.0296667	6.41233	5.01233	12.4693	1.87333	10.8933	3.56833	1.23533	4.57467	0.758	5.463	1.19467	3.18133	0.468667	3.40533	0.466333	2.27233	1.292	0.311333	0.0966667
DB02-204	inner OIC	48.636	347.737	75.5447	4.61833	164.948	21.5177	53.949	3.23133	0.093	47.225	3.54133	8.82	1.40267	6.726	2.61867	0.927333	3.208	0.527	3.73267	0.838667	2.303	0.318667	2.193	0.348333	1.65233	0.925	0.227333	0.075
DB02-230	inner OIC	49.8797	352.053	97.8073	0.979333	106.778	23.7313	61.635	3.85867	0.0206667	16.217	3.07667	9.10067	1.40233	7.476	2.45133	1.044	3.37833	0.645	4.18267	0.895333	2.74733	0.348	2.59967	0.369	1.80367	0.989333	0.239333	0.086
DB02-246	inner OIC	46.287	409.927	22.1393	1.98	122.707	28.0207	57.5627	2.81333	0.024	57.7683	3.56533	8.79733	1.28567	7.63033	2.66733	0.979	3.577	0.634333	4.69067	0.985	3.25167	0.501333	3.20533	0.524333	1.77167	1.00267	0.317333	0.0996667
DB02-266	inner OIC	50.7403	405.784	71.6953	4.508	130.216	22.5893	55.6673	4.05133	0.104667	21.974	3.34967	8.86133	1.39333	7.25667	2.16567	0.972	2.99933	0.536667	3.69633	0.811667	2.45633	0.361667	2.29667	0.37	1.46933	0.909667	0.263333	0.0933333
DB05-107	inner OIC	49.8393	314.463	147.48	1.101	129.677	18.781	44.201	3.13533	bdl	16.236	2.624	7.02533	1.10667	5.84433	1.95467	0.699	2.55067	0.409333	3.1	0.697333	1.97367	0.317	2.12433	0.301	1.24733	0.318333	0.205667	0.0743333
DB05-108	inner OIC	50.132	329.571	127.484	3.07667	128.22	19.6797	44.7997	3.04267	bdl	24.3127	2.67767	7.123	0.991	5.66067	1.70067	0.759333	2.272	0.419	3.08333	0.632667	1.977	0.265333	2.00933	0.286	1.237	0.217667	0.201	0.0516667
DB06-054	inner OIC	49.4893	304.772	128.06	1.402	134.958	15.728	35.369	2.41233	bdl	23.1747	2.117	5.69467	0.884	5.10167	1.733	0.601	2.30967	0.3955	2.84267	0.641	1.81533	0.276667	1.876	0.306667	1.146	0.485333	0.161667	0.0866667
DB06-058	inner OIC	51.3	356.737	107.364	0.643333	201.773	24.0817	59.3307	3.44033	bdl	115.339	2.94967	8.368	1.28167	7.41833	2.69133	0.947	3.22767	0.637	4.23267	0.886667	2.67333	0.361333	2.64667	0.396333	1.71067	0.575	0.250333	0.0893333
DB06-061	inner OIC	44.5613	321.439	8.20967	0.853333	53.0453	53.162	147.82	10.385	bdl	18.464	8.41267	22.512	3.42233	17.8063	5.509	2.12633	7.70333	1.34767	9.41867	1.94267	5.91133	0.908333	5.819	0.858333	4.223	0.503667	0.715667	0.219667
DB06-065	inner OIC	52.3167	311.364	106.328	1.411	123.288	21.9653	39.1147	1.47467	bdl	741.898	1.60167	4.446	0.845333	4.639	1.883	0.773667	2.56933	0.498	3.65467	0.826667	2.332	0.304667	2.59633	0.357	1.31333	0.306667	0.103667	0.0383333
DB06-066	inner OIC	38.7267	399.134	86.668	6.502	290.928	33.0903	162.804	16.5267	bdl	384.345	13.9003	34.3737	4.89067	23.4157	6.29667	1.952	6.89167	1.067	6.404	1.10767	3.23333	0.456	2.86233	0.413	4.328	0.816667	1.219	0.396667
DB06-070	inner OIC	52.7817	356.463	108.368	0.918667	229.948	21.4743	44.2187	3.12	bdl	31.327	2.93267	6.94433	1.157	6.00267	1.873	0.811667	2.74967	0.518	3.56067	0.736333	2.15833	0.317333	2.23533	0.342333	1.44533	0.35	0.203667	0.0773333
DB06-075	inner OIC	50.087	413.524	42.8907	4.47567	141.078	34.2323	70.1933	2.96	bdl	69.3383	2.96767	8.24933	1.418	7.73733	3.07033	1.04467	4.57433	0.821667	5.866	1.27433	3.737	0.604	3.81967	0.564333	2.023	0.338	0.224333	0.0806667
DJ01-022	inner OIC	49.3443	310.782	135.912	2.098	140.017	17.4583	40.8493	2.55767	0.072	32.4957	2.313	6.16533	0.908	4.786	1.80767	0.698333	2.27433	0.438333	3.05133	0.646333	1.982	0.264	2.02033	0.274	1.12267	2.19967	0.208667	0.059
DJ01-115	inner OIC	48.238	329.665	102.613	2.58267	157.311	21.7367	58.1167	3.41633	0.0953333	116.477	2.92933	8.27867	1.38333	7.16333	2.576	0.902333	3.21067	0.584333	3.87267	0.825333	2.36133	0.376	2.217	0.348667	1.65067	2.79333	0.253	0.116667
GDM-90303	inner OIC	51.9857	337.851	113.513	15.0087	152.493	16.9473	38.0545	2.9345	0.33425	208.621	2.5155	6.687	1.0905	5.4205	2.03775	0.724	2.6355	0.4695	3.37575	0.8135	2.037	0.3195	2.2165	0.3525	1.335	1.7755	0.222	0.0785
GDM-91044	inner OIC	48.1585	303.55	132.181	3.042	249.897	19.2585	42.6633	2.51125	0.21325	79.5738	2.32625	6.096	0.95625	5.01025	1.6115	0.593	2.308	0.395	3.115	0.59325	2.0095	0.24025	1.678	0.28075	1.13075	2.07525	0.17025	0.091
bdl=beyond detection limit
Standard		Sc	V	Ni	Rb	Sr	Y	Zr	Nb	Cs	Ba	La	Ce	Pr	Nd	Sm	Eu	Gd	Tb	Dy	Ho	Er	Tm	Yb	Lu	Hf	Pb	Th	U
USGS GSP-2 (n=3)*		7.56433	58.929	15.1585	210.455	218.441	23.6367	525.763	24.0013	0.992667	1240.9	171.019	408.097	49.4067	189.554	24.253	2.08533	11.9783	1.158	5.34267	0.831	2.14233	0.282667	1.512	0.227667	12.919	38.1677	99.7557	2.26833
Certified average		6.3	52	17	245	240	28	550	27		1340	180	410		200	27	2.3							1.6			42	105	2.4
*USGS GSP-2 granodiorite powder smelted with lithium tetraborate, Ca int.std., Pearce et al. 1997 + GeoRem SRM 612

## Sheet: Table 4
Table 4. Radiogenic isotope data
Sample	Group	Age(a)		Sm	Nd	147Sm/144Nd	143Nd/144Ndm	143Nd/144Ndt	ɛNdt		Pb(b)	U(c)	Th	206Pb/204Pbm	207Pb/204Pbm	208Pb/204Pbm	206Pb/204Pbt	207Pb/204Pbt	208Pb/204Pbt
		(Ma)		(ppm)	(ppm)						(ppm)	(ppm)	(ppm)
DB05-113	Group 1	62		5.34167	18.7223	0.171731	0.513063	0.512993	8.48257		0.748893	0.271	0.897667	19.1856	15.5689	38.6407	18.9608	15.5583	38.396
DB05-153	Group 1	62		4.938	17.4213	0.170609	0.512983	0.512914	6.93455		0.696853	0.311667	0.946333	19.373	15.5879	38.8226	19.0936	15.5747	38.544
DB05-155	Group 2	62		4.13967	12.773	0.195076	0.513094	0.513015	8.91085		0.51092	0.0903333	0.319333	18.4487	15.5234	38.1156	18.3408	15.5183	37.9903
DB05-155 (replicate)	Group 2	62		4.13967	12.773	0.195076	0.513097	0.513018	8.96001		0.51092	0.0903333	0.319333	18.4571	15.5242	38.125	18.3491	15.5191	37.9996
DB02-197	Group 3	62		2.02	5.50975	0.220674	0.513221	0.513132	11.1915		0.22039	0.0405469	0.046	18.5138	15.5278	38.0584	18.4015	15.5224	38.0166
DB02-239	Group 3	62		3.79125	9.4715	0.240932	0.51319	0.513093	10.4245		0.37886	0.0875	0.1355	18.6858	15.5275	38.0918	18.5444	15.5208	38.0198
DB05-114	Group 3	62		2.956	6.74867	0.263644	0.513227	0.51312	10.9635		0.269947	0.0306667	0.068	18.5063	15.5077	37.9455	18.4371	15.5045	37.8951
DB05-135	Group 3	62		4.045	9.98133	0.243928	0.513183	0.513084	10.2507		0.399253	0.062	0.101333	18.6998	15.5245	38.1356	18.6047	15.52	38.0845
(a) value used for the age correction, see Supplementary File 1 for a discussion on correcting radiogenic ingrowth.
(b) based on Nd/Pb = 25±5.
(c) sample DB02-197 estimated.
Nd and Pb isotope ratios by TIMS in static multi collection mode on a TRITON Plus and MAT262 respectively. Mass bias correction uses 146Nd/144Nd = 0.7219 and a 207Pb-204Pb double spike. Sample data are reported relative to 143Nd/144Nd = 0.511850 ± 6 (2SD, n = 114) for La Jolla and 206Pb/204Pb = 16.9427 ± 21, 207Pb/204Pb = 15.5005 ± 21, 208Pb/204Pb = 36.7278 ± 46, 208Pb/206Pb = 2.167765 ± 63 and 2…
